# Supplementary material for: GPNMB plays a protective role against obesity-related metabolic disorders by reducing macrophage inflammatory capacity
Source: PubMed Central journal article supplement (PMC8524194; doi:10.1016/j.jbc.2021.101232), 2021-09-25
Supplement: mmc1.pdf [file mmc1.pdf]

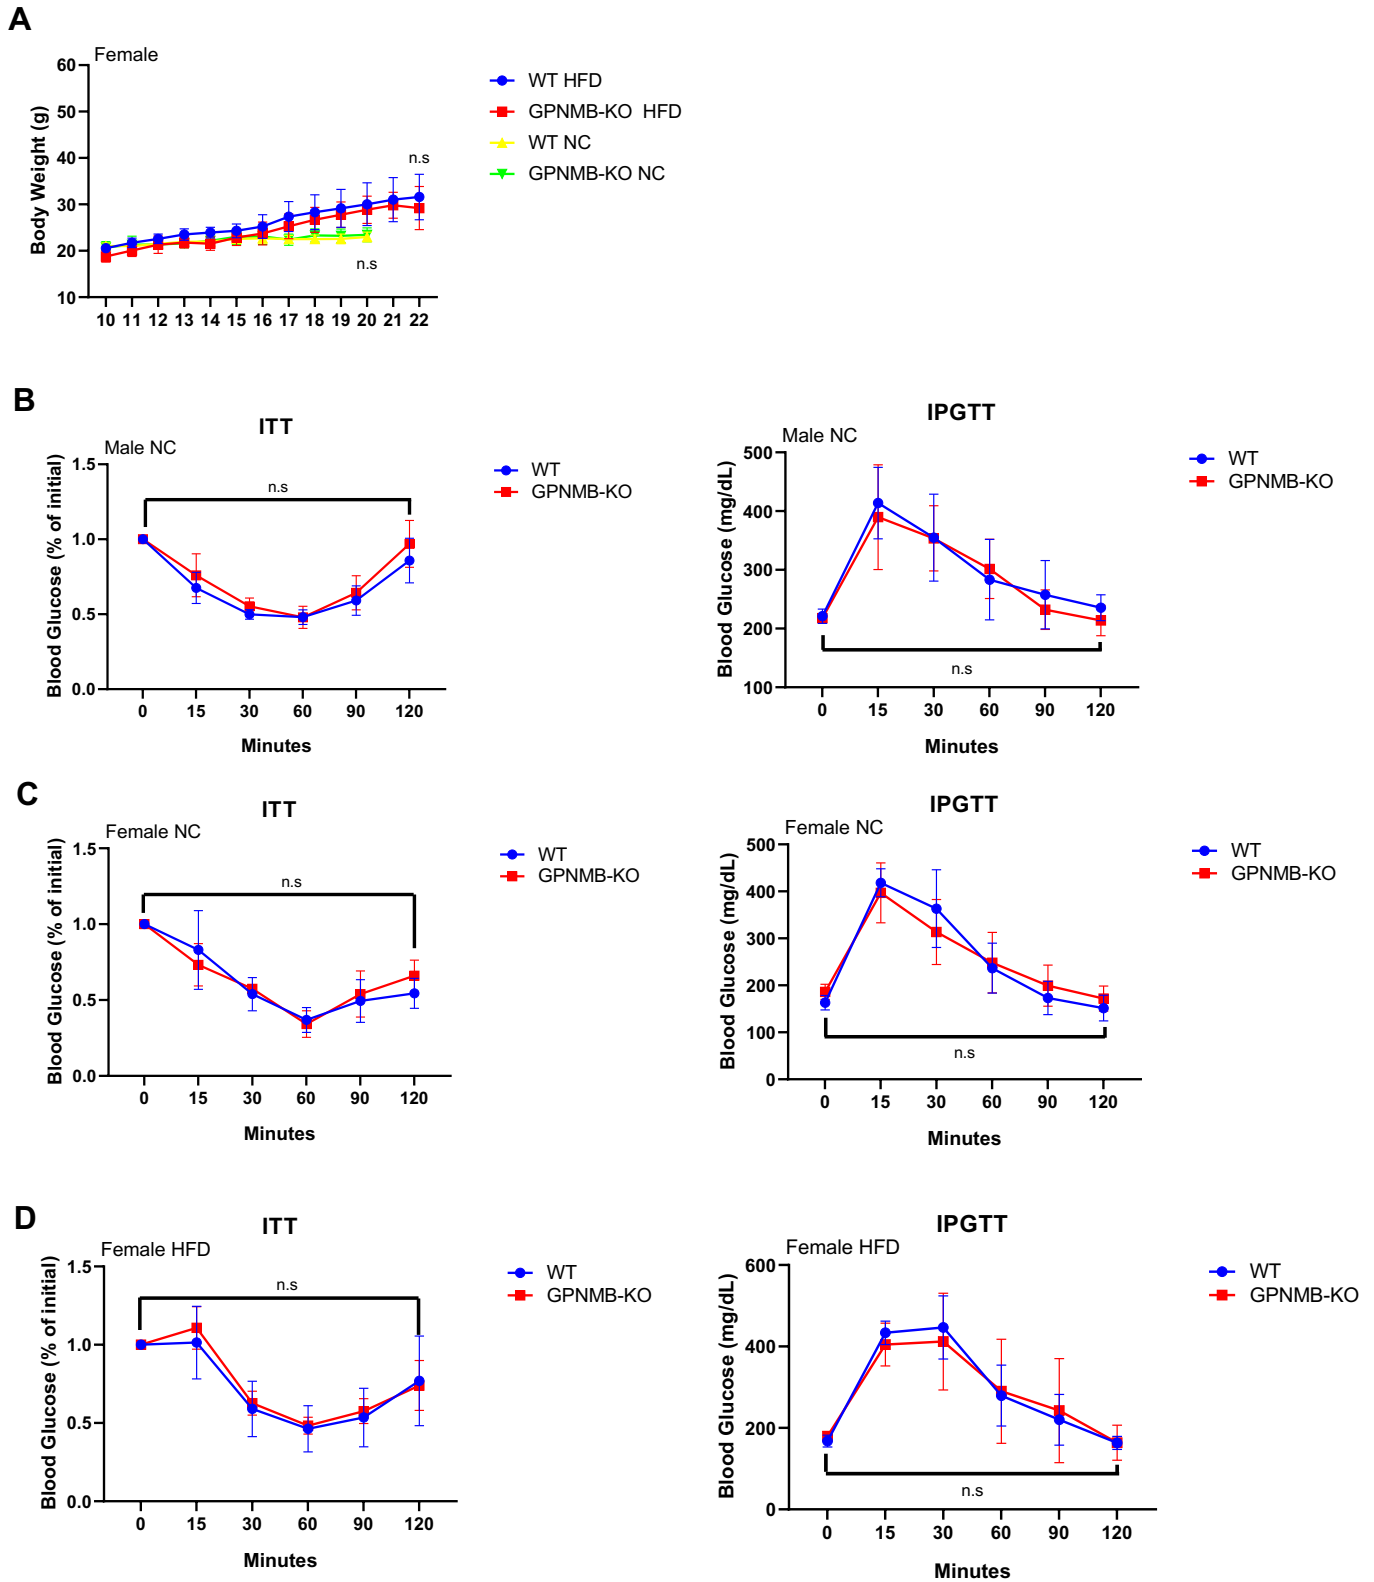

**Supplementary Fig 1. Metabolic phenotype in male mice fed with NC and in female mice fed with NC or HFD.**

(A) Body weight of female WT and GPNMB-KO mice fed either normal chow (NC) or HFD at the indicated ages of weeks ( $n = 6$  for WT HFD;  $n = 5$  for GPNMB-KO HFD;  $n = 7$  for WT NC;  $n = 6$  for WT HFD). (B) ITT and IPGTT in male WT and GPNMB-KO mice fed NC for 10 weeks ( $n = 5$  each). (C) ITT and IPGTT in female WT and GPNMB-KO mice fed NC for 10 weeks ( $n = 6$  for WT;  $n = 5$  for KO). (D) ITT and IPGTT in female WT and GPNMB-KO mice fed HFD for 12 weeks ( $n = 5$  each). Data represent mean  $\pm$  SDM. Two-tailed student's  $t$ -test was used for the analysis of the differences between groups (A-D).

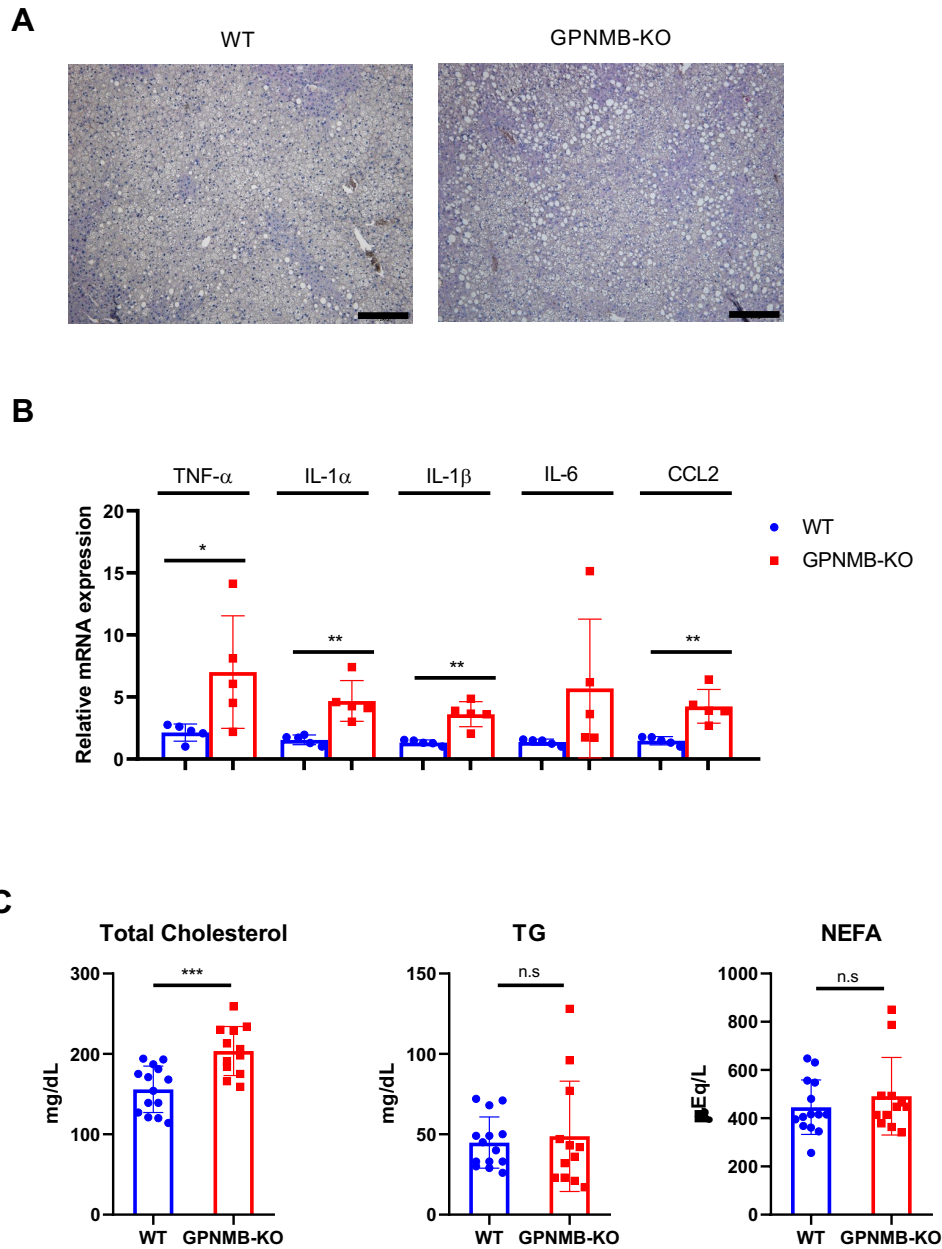

**Supplementary Figure 2. Liver phenotype and serum lipid profiles in HFD-fed male WT and GPNMB-KO mice.** (A) Representative images of hematoxylin and eosin staining of liver sections prepared from male WT and GPNMB-KO mice fed with HFD. Bar = 200  $\mu$ m. (B) Quantitative PCR analysis for TNF- $\alpha$ , IL-1 $\alpha$ , IL-1 $\beta$ , IL-6, and CCL-2 in liver isolated from male WT and GPNMB-KO mice fed with HFD (n = 5 each). (C) Serum lipid profiles in male WT and GPNMB-KO mice fed with HFD (n = 14 for WT; n = 12 for KO). Data represent mean  $\pm$  SDM. \* $P$  < 0.05, \*\* $P$  < 0.01, and \*\*\* $P$  < 0.001. Two-tailed student's  $t$ -test was used for the analysis of the differences between groups (B and C).

**A**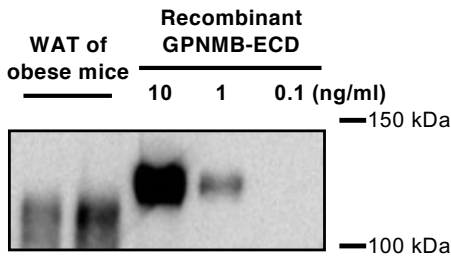**B**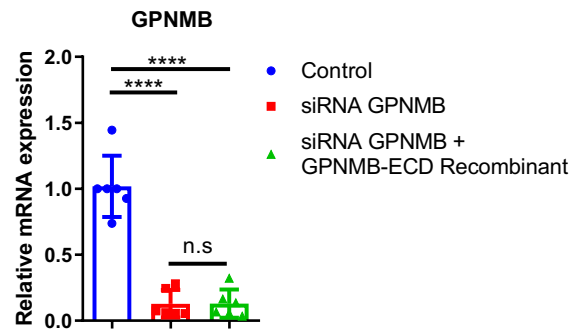**C**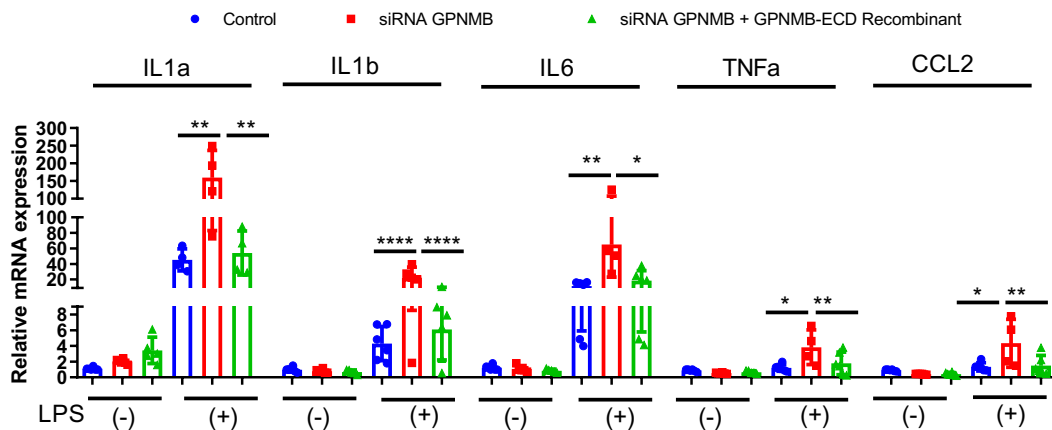

### Supplementary Figure 3. Anti-inflammatory role of GPNMB in RAW264.7 macrophages.

**(A)** Immunoblotting for GPNMB in the WAT of obese mice (~10 mg/ml) and the recombinant GPNMB-ECD at various concentration. **(B)** Quantitative PCR analysis for GPNMB in RAW264.7 macrophages transfected with either negative (control) or GPNMB siRNA. Some cells transfected with GPNMB were cultured in the presence of recombinant GPNMB-ECD (n = 6 each). **(C)** Quantitative PCR analysis for TNF- $\alpha$ , IL-1 $\alpha$ , IL-1 $\beta$ , IL-6, and CCL-2 in RAW264.7 cells with or without LPS-treatment. Cells were transfected with either negative (control) or GPNMB siRNA. Some cells transfected with GPNMB were cultured in the presence of recombinant GPNMB-ECD (n = 4-6 each). Data represent mean  $\pm$  SDM. \* $P < 0.05$ , \*\* $P < 0.01$ , and \*\*\*\* $P < 0.0001$ . One-way ANOVA with Tukey's post hoc test for multiple comparisons was used for the analysis of the differences between each group (B and C).

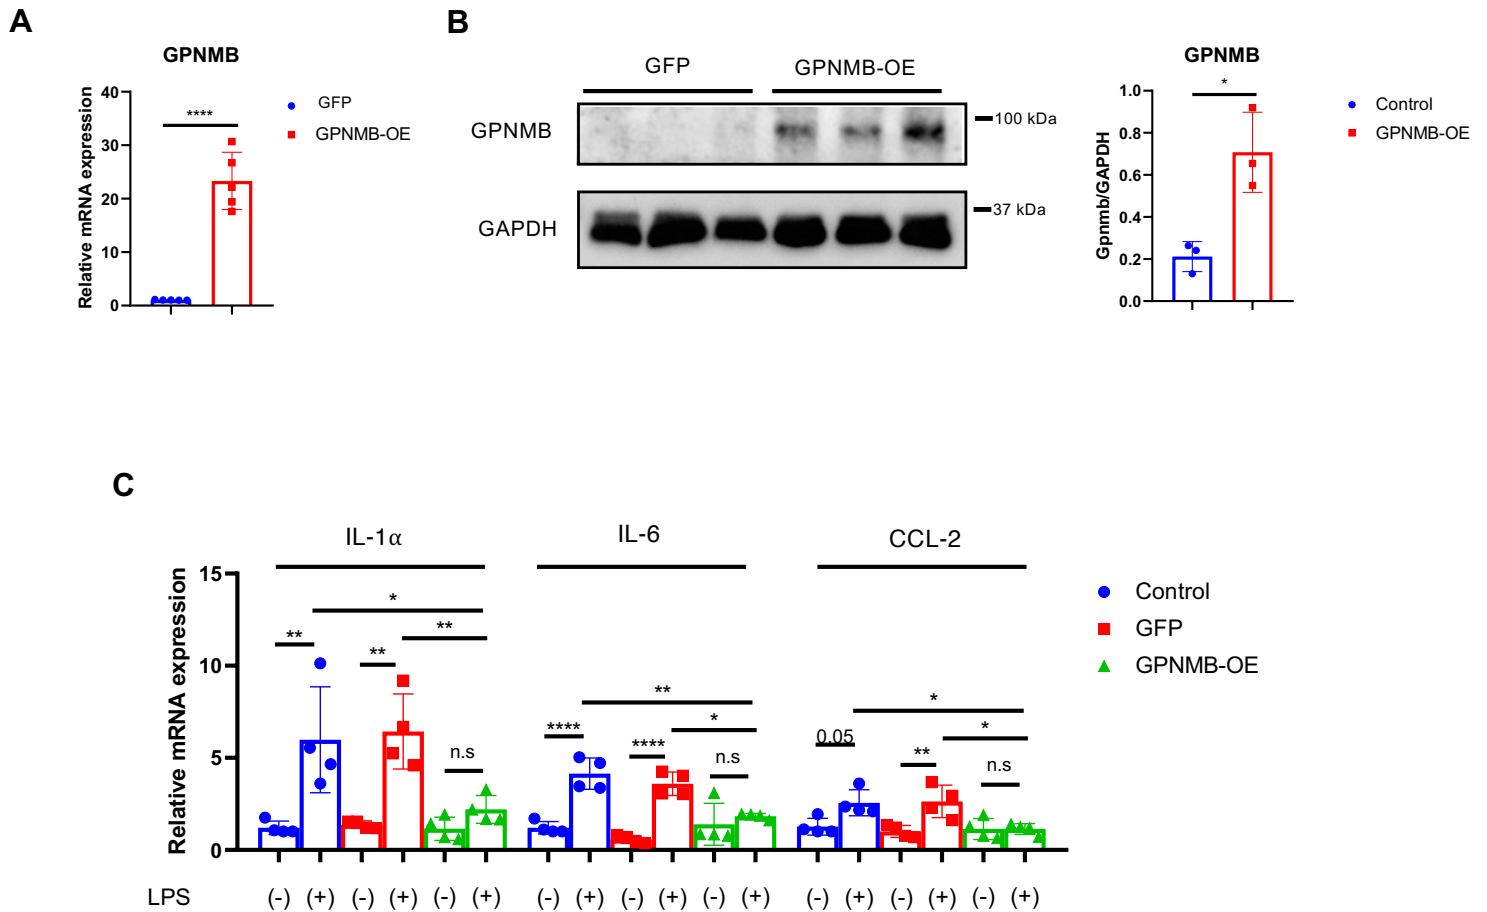

**Supplementary Fig. 4. Adipocyte-derived GPNMB reduces macrophage inflammability.**

**(A)** Quantitative PCR analysis for GPNMB in 3T3L1 adipocytes transfected with either GFP or GPNMB (GPNMB-OE) using lentiviruses ( $n = 5$  each). **(B)** Immunoblotting for GPNMB in 3T3L1 adipocytes transfected with either GFP or GPNMB (GPNMB-OE) using lentiviruses ( $n = 3$  each). **(C)** Conditioned medium was collected from 3T3-L1 adipocytes transfected with either GFP or GPNMB (GPNMB-OE), and then given to RAW264.7 macrophages. Some cells were given medium incubated without cells (control). Subsequently, cells were treated with LPS, and IL-1 $\alpha$ , IL-6, and CCL-2 expressions were quantitatively analyzed ( $n = 4$  each). Data represent mean  $\pm$  SD. \* $P < 0.05$ , \*\* $P < 0.01$ , \*\*\* $P < 0.001$ , and \*\*\*\* $P < 0.0001$ . Data are presented as mean  $\pm$  SD. Two-tailed student's t-test was used for the analysis of the differences between two groups (A and B), while one-way ANOVA with Tukey's post hoc test for multiple comparison was used for the analysis of the differences between each group (C).

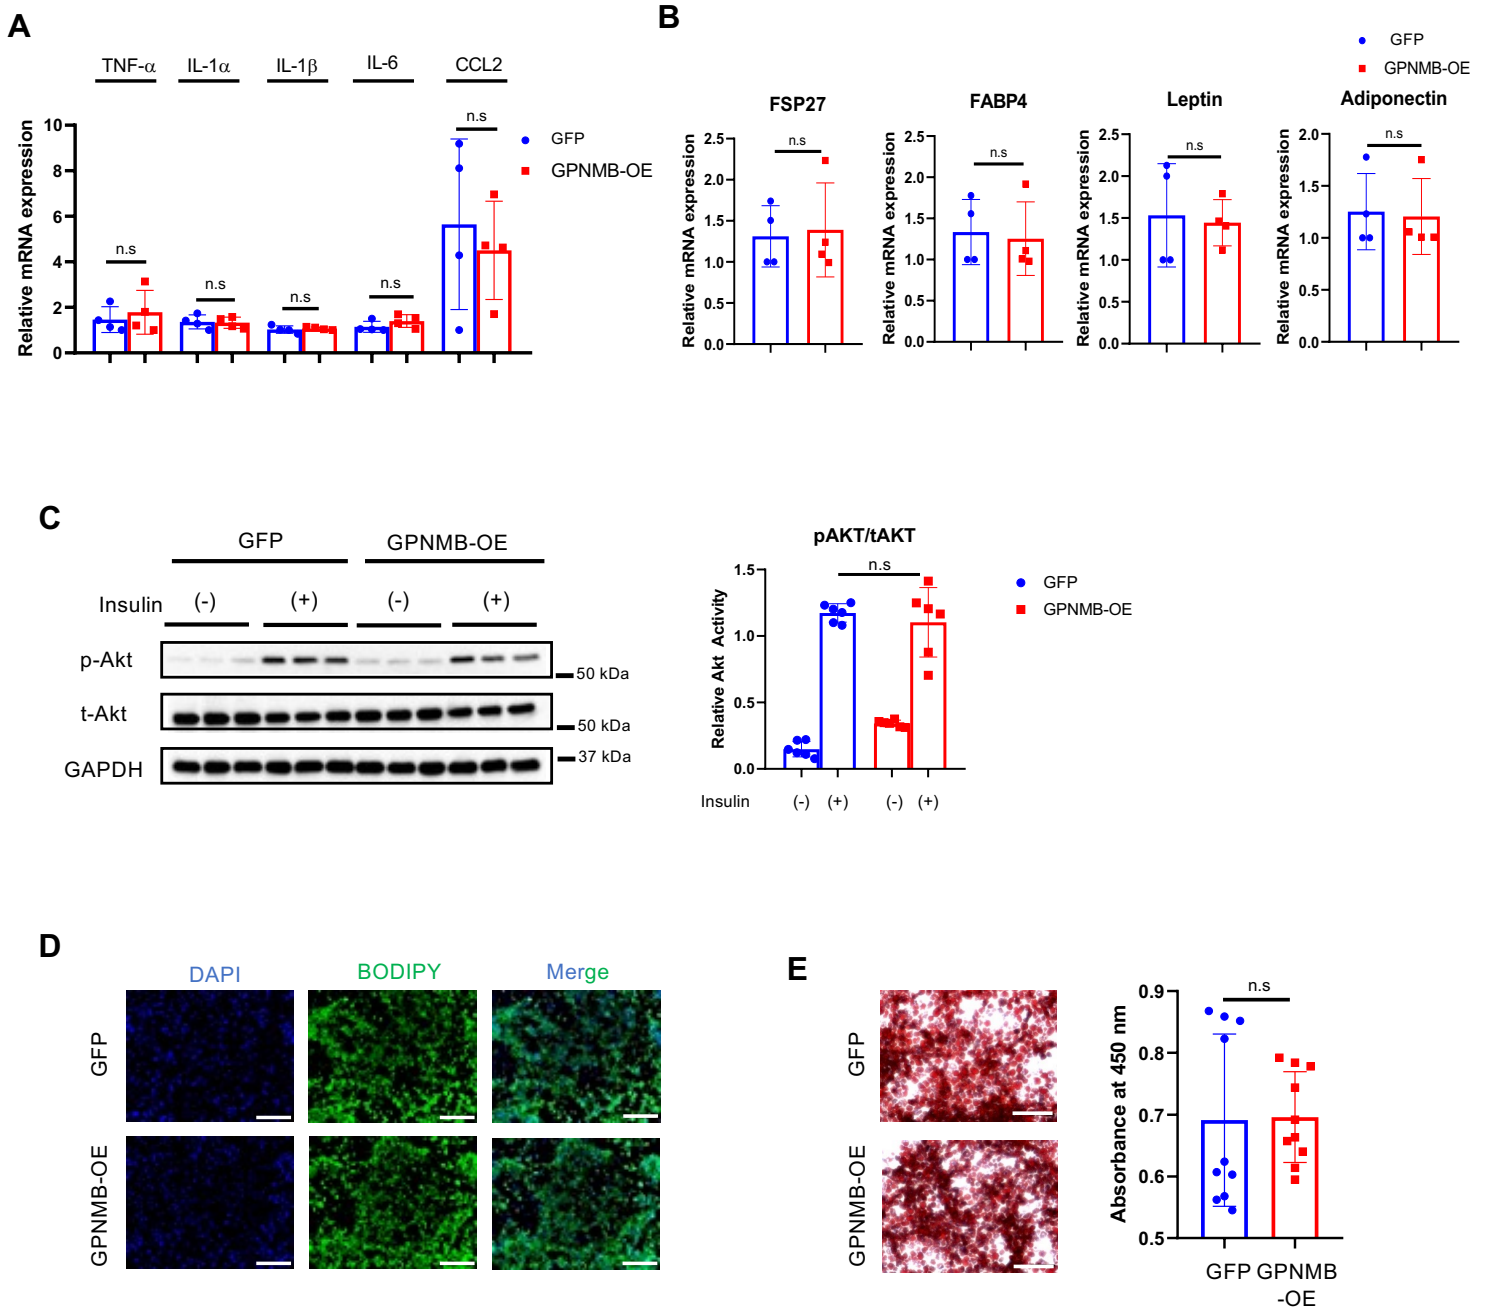

**Supplementary Fig. 5. Minimal role of GPNMB in adipocyte biology.**

(A) Quantitative PCR analysis for TNF- $\alpha$ , IL-1 $\alpha$ , IL-1 $\beta$ , IL-6, and CCL-2 in 3T3L1 adipocytes transfected with either GFP or GPNMB (GPNMB-OE) using lentiviruses ( $n = 4$  each). (B) Quantitative PCR analysis for FSP27, FABP4, Leptin, and Adiponectin expression in 3T3L1 adipocytes transfected with either GFP or GPNMB (GPNMB-OE) using lentiviruses ( $n = 4$  each). (C) Immunoblotting for insulin signaling in 3T3L1 adipocytes transfected with either GFP or GPNMB (GPNMB-OE) using lentiviruses. Insulin-mediated Akt activation was quantified ( $n = 6$  each). (D) Representative images of BODIPY-staining in 3T3L1 adipocytes transfected with either GFP or GPNMB (GPNMB-OE) using lentiviruses. Bars = 200  $\mu\text{m}$ . (E) Representative images of ORO-staining in 3T3L1 adipocytes transfected with either GFP or GPNMB (GPNMB-OE) using lentiviruses. Bars = 100  $\mu\text{m}$  (left). ORO absorbance at 450 nm was quantified ( $n = 10$  each; right). Data represent mean  $\pm$  SDM. Two-tailed student's t-test was used for the analysis of the differences between two groups (A, B and E), while one-way ANOVA with Tukey's post hoc test for multiple comparison was used for the analysis of the differences between each group (C).

**A**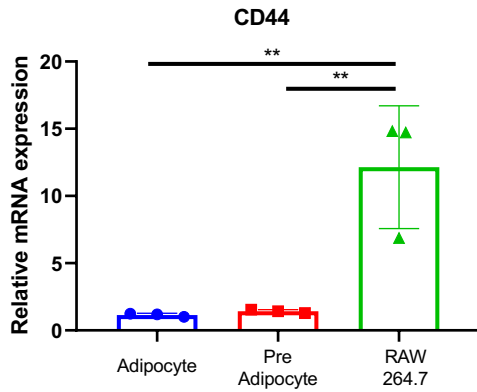**B**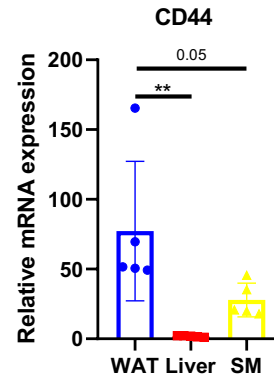**C**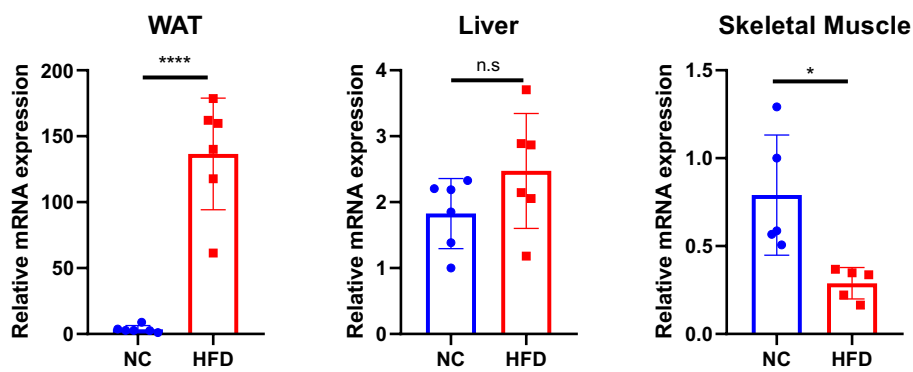

**Supplementary Figure 6. CD44 is highly expressed in macrophages and in the WAT.**

(A) Quantitative PCR analysis for CD44 in 3T3-L1 preadipocytes, 3T3-L1-derived adipocytes and RAW264.7 macrophages (n = 3 each). (B) Quantitative PCR for CD44 expression in the WAT, liver, and skeletal muscle (SM) isolated from male WT mice fed with normal chow (NC) (n = 5 each). (C) Quantitative PCR analysis for CD44 in the WAT, liver, and skeletal muscle isolated from male mice fed with NC or HFD (n = 6 for WAT and liver; n = 5 for skeletal muscle). Data represent mean  $\pm$  SDM. \* $P < 0.05$  and \*\*\*\* $P < 0.0001$ . Two-tailed student's t-test was used for the analysis of the differences between two groups (C), while one-way ANOVA with Tukey's post hoc test for multiple comparison was used for the analysis of the differences between each group (A and B).

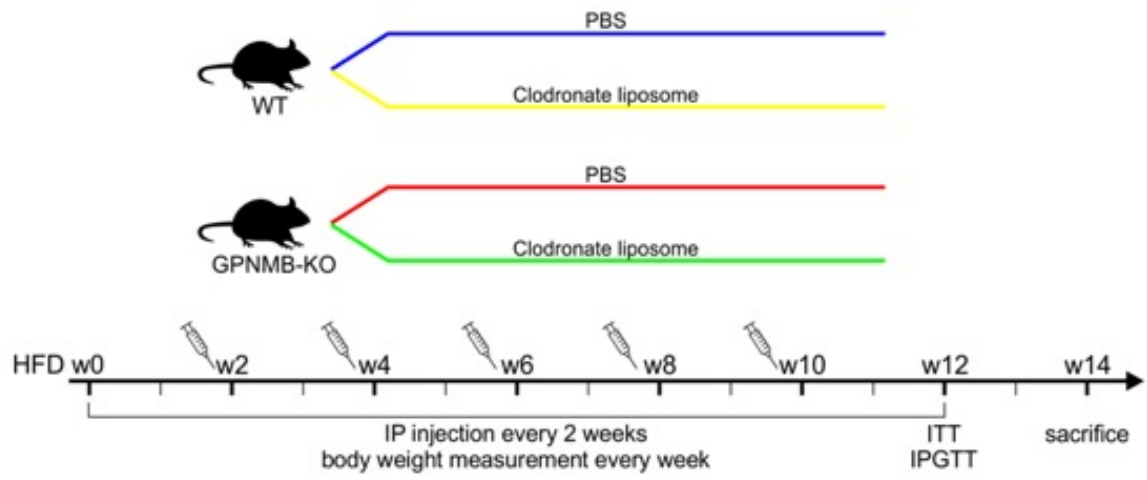

Clodronate liposome concentration: 6.3 mg/ kg/ 2 weeks

**Supplementary Figure 7. Schematic diagram of clodronate experiments.**

**A**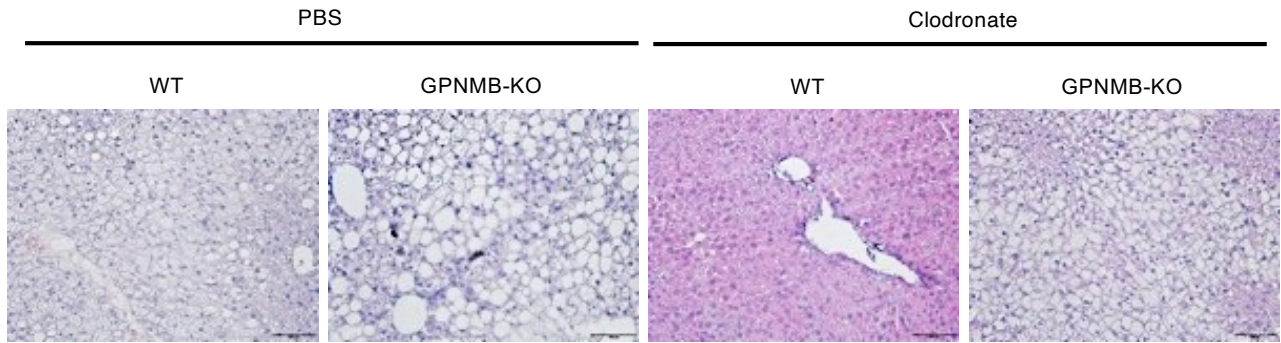**B**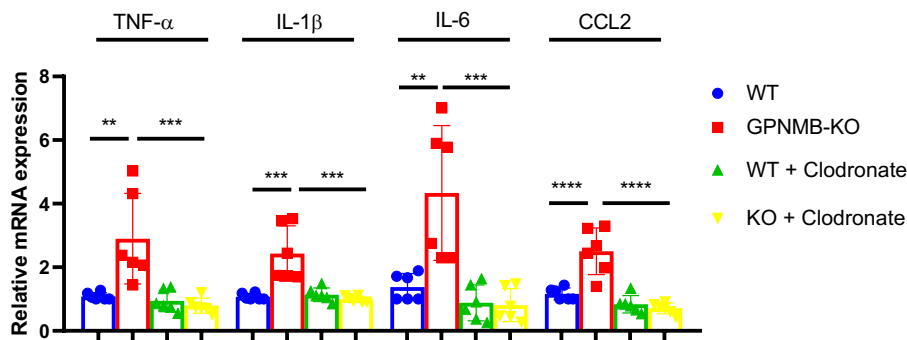

**Supplementary Figure 8. Liver phenotypes in male HFD-fed WT and GPNMB-KO mice treated with clodronate liposomes.**

**(A)** Representative images of H-E staining of liver sections prepared from male WT and GPNMB-KO mice fed with HFD for 14 weeks. Mice were injected with either PBS or clodronate liposomes once in 2 weeks during the HFD-feeding. Bar = 100  $\mu$ m. **(B)** Quantitative PCR analysis for TNF- $\alpha$ , IL-1 $\beta$ , IL-6, and CCL-2 in liver isolated from male WT and GPNMB-KO mice fed an HFD for 14 weeks (n = 6 each). Mice were injected with either PBS or clodronate liposomes once in 2 weeks during the HFD-feeding. Data represent mean  $\pm$  SDM. \*\* $P < 0.01$ , \*\*\* $P < 0.001$ , and \*\*\*\* $P < 0.0001$ . One-way ANOVA with Tukey's post hoc test for multiple comparison was used for the analysis of the differences between each group (B).



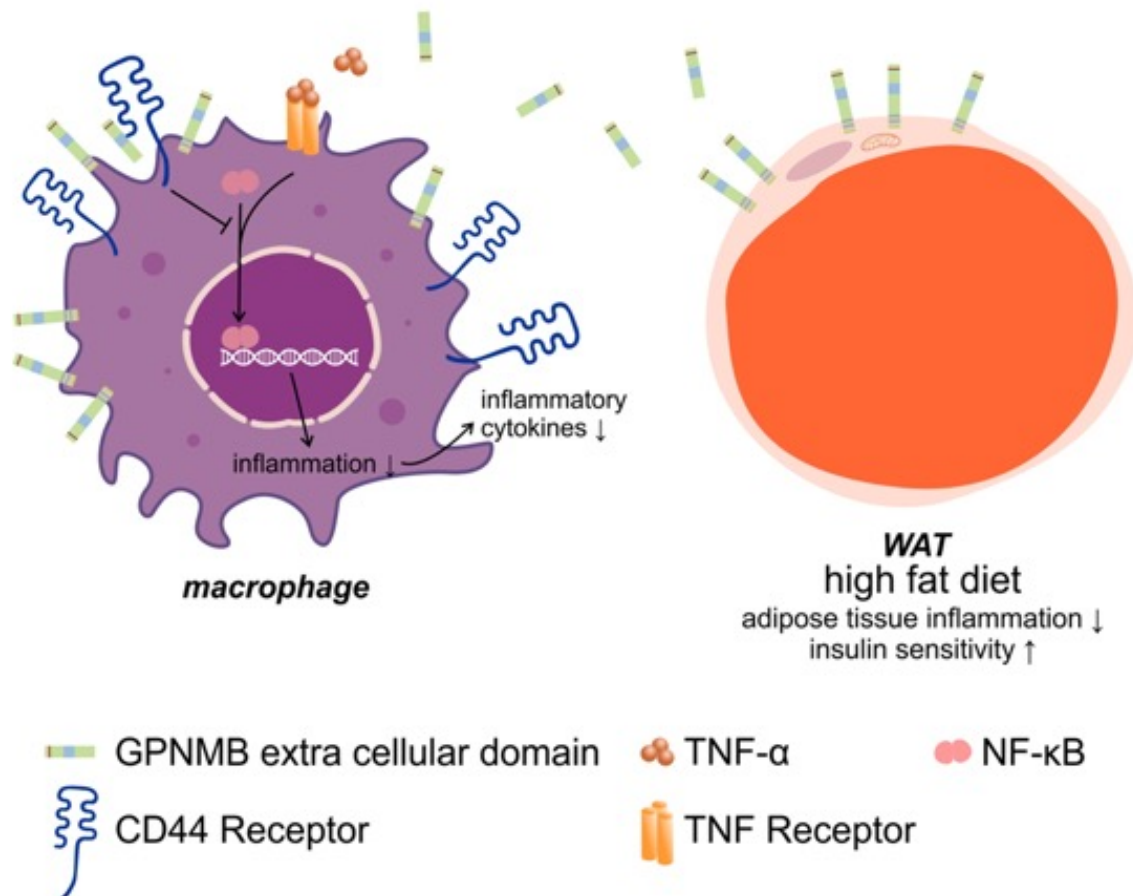

**Supplementary Figure 9. Schematic diagram of the working model for a role of GPNMB in obesity-related metabolic disorders.**

GPNMB is highly expressed in macrophages, and its soluble secreted ECD reduces their inflammatory capacities in an autocrine manner. GPNMB-ECD binds to CD44, leading to inhibition of CD44-mediated accentuation of NF-κB signaling. In obesity, GPNMB expression is remarkably upregulated in adipocytes, and adipocyte-derived GPNMB may also inhibit the macrophage inflammability in a paracrine matter in the WAT.
